# Supplementary material for: Copper(i)-iodide based coordination polymers: bifunctional properties related to thermochromism and PMMA-doped polymer film materials
Source: Royal Society of Chemistry journal article supplement (doi:10.1039/c5tc01273b), 2015-01-01
Supplement: c5tc01273b1.pdf [file c5tc01273b1.pdf]

## Supporting Information

### Copper(I)-Iodide Based Coordination Polymers: Bifunctional Properties Related to Thermochromism and PMMA-Doped Polymer Film Materials

Yang Song<sup>a</sup>, Ruiqing Fan<sup>a\*</sup>, Ping Wang<sup>a</sup>, Xinming Wang<sup>a</sup>, Song Gao<sup>a</sup>, Xi Du<sup>a</sup>, Yulin Yang<sup>a\*</sup> and Tianzhu Luan<sup>b</sup>

<sup>a</sup>Department of Chemistry, Harbin Institute of Technology, Harbin 150001, P. R. of China

<sup>b</sup>The First Affiliated Hospital of Harbin Medical University, Harbin 150001, P. R. of China

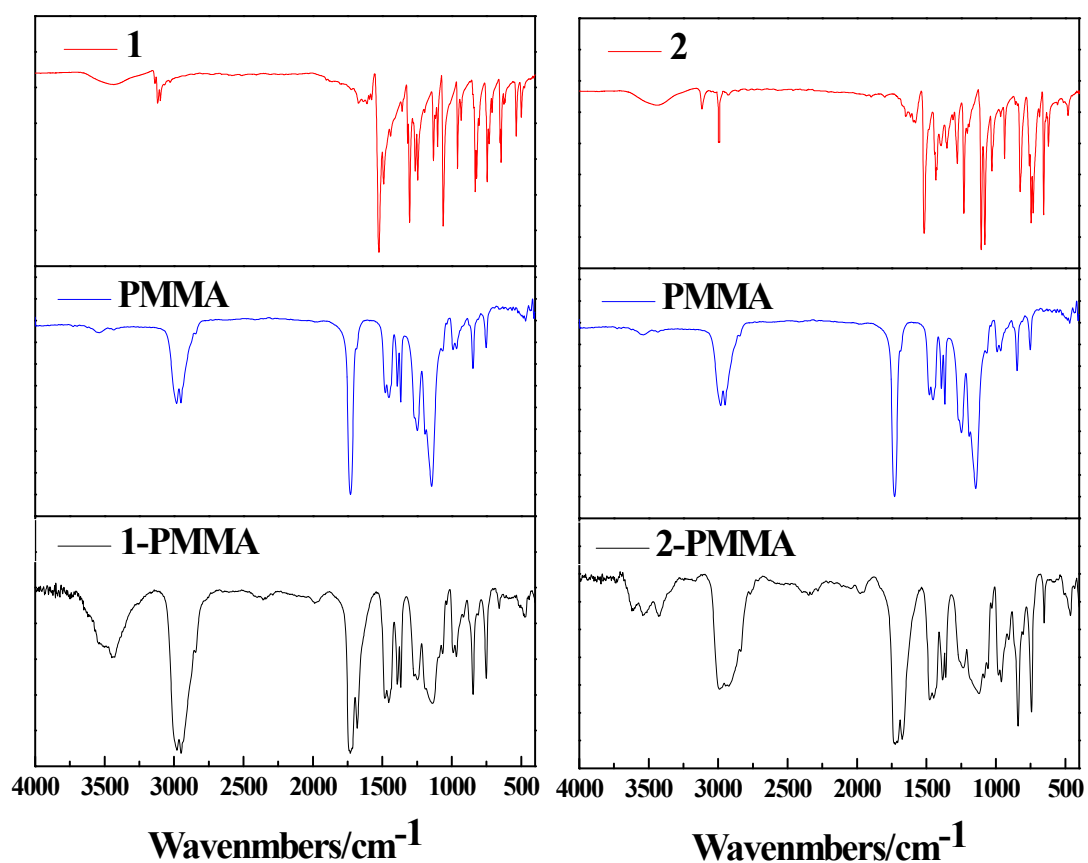

Fig.S1 The IR spectra of pure PMMA, coordination polymers 1, 2 and 1-PMMA, 2-PMMA.

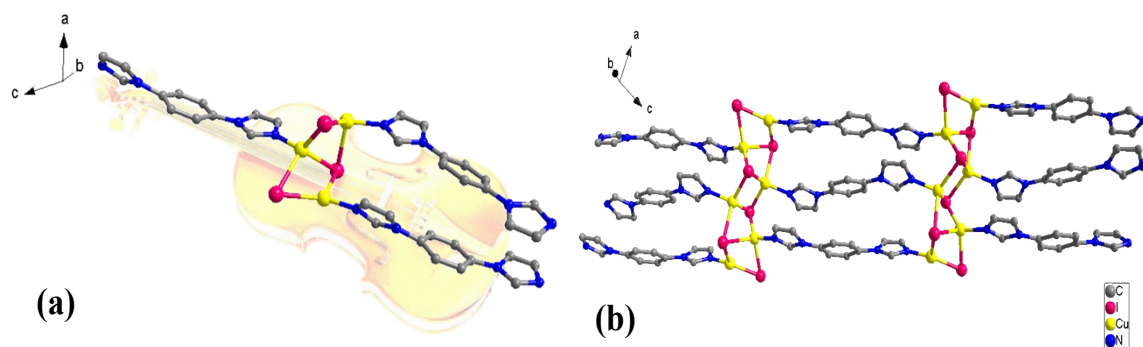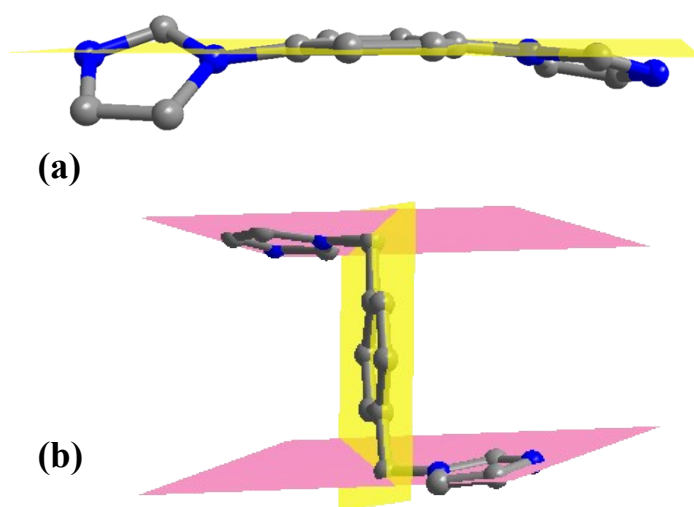

Fig.S3 The coplanarity of ligand bib and the twist of ligand bix.

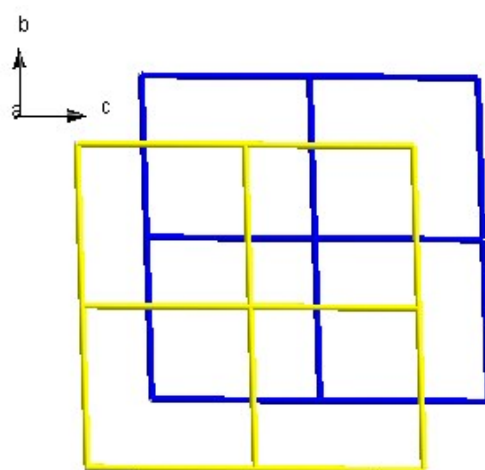

Fig.S4 The independent two-fold non-interpenetrating frameworks with **sql** network in **2**.

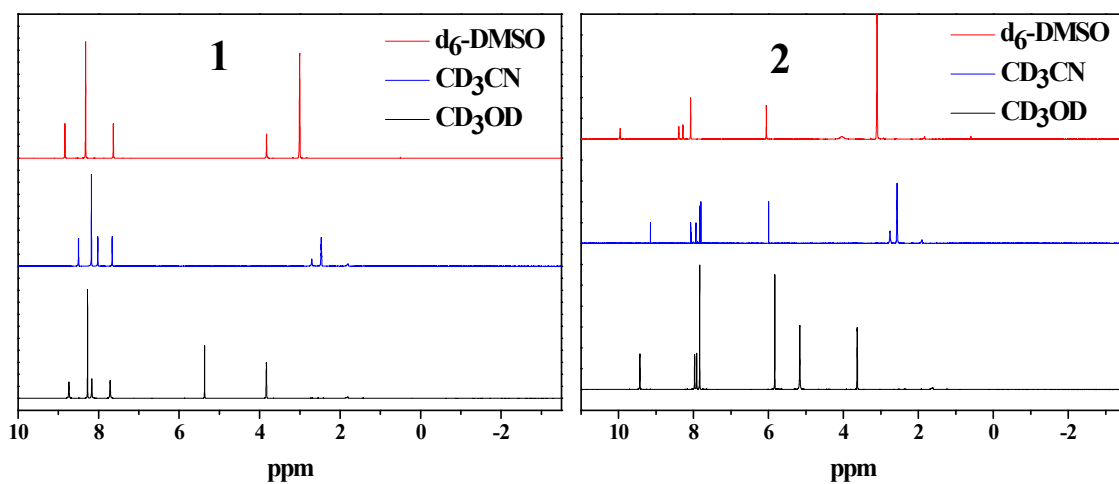

Fig.S5 The  $^1\text{H}$  NMR spectra of **1** and **2**.

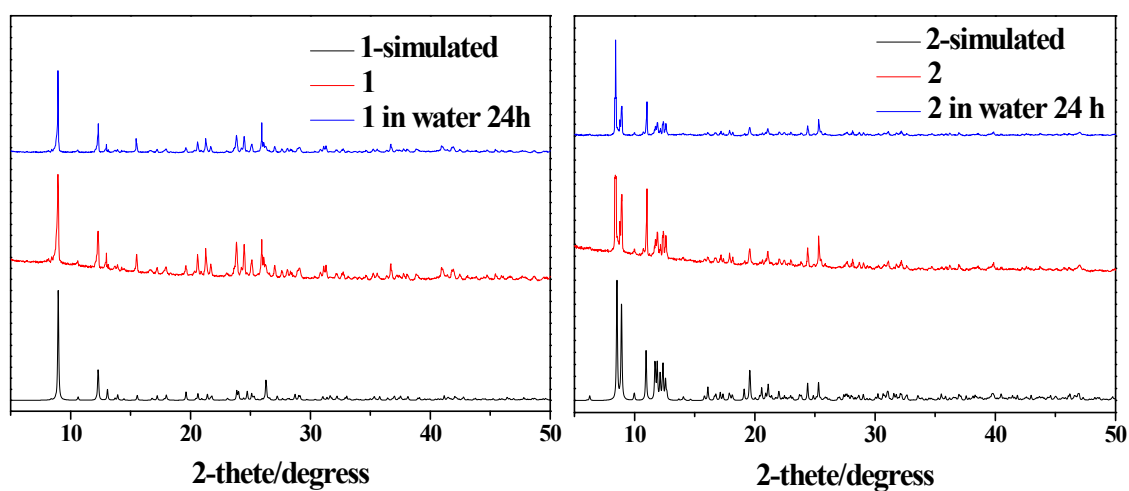

Fig.S6 The PXRD patterns of coordination polymers **1** and **2** with the relevant simulated patterns, and **1** and **2** samples soaked in water for 24 h.

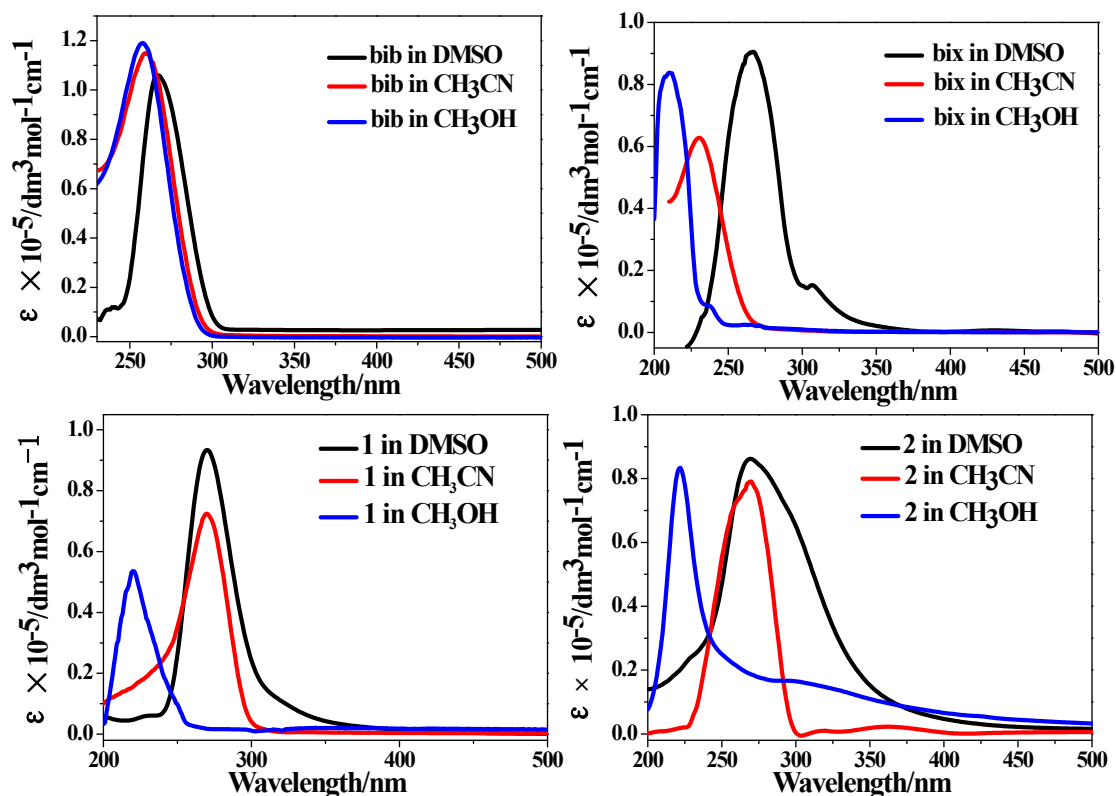

Fig.S7 UV absorption spectra of bib, bix and coordination polymers 1 and 2.

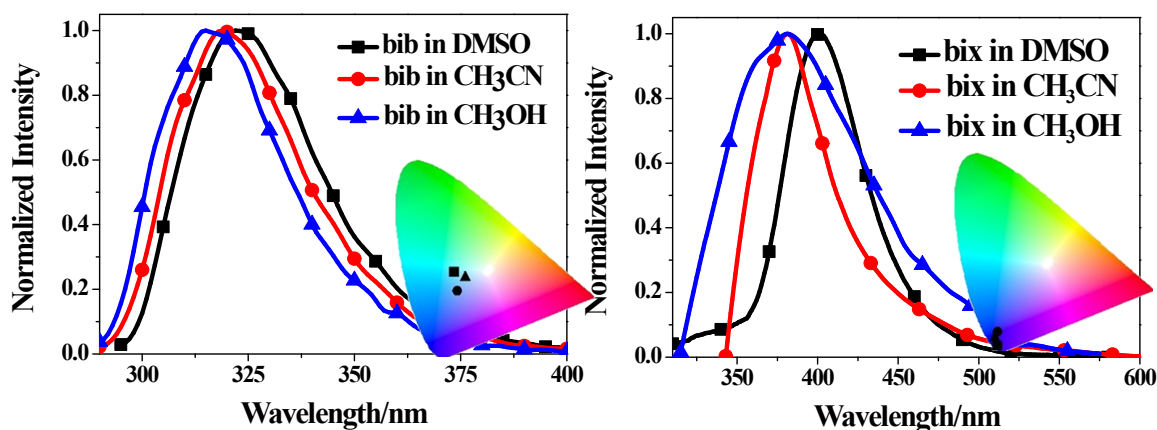

Fig.S8 Normalized emission spectra of ligands bib and bix in DMSO, CH<sub>3</sub>CN and CH<sub>3</sub>OH solutions (concentration: (M)  $\approx 10^{-5}$  M) at 298 K and the corresponding color coordinate diagram of emission.

**Table S1** The summary of the luminescent properties of Cu<sub>4</sub>I<sub>4</sub>-based luminescent materials.

| No. | Cite                                                    | Complex                                                                                                                                                                                                                                                                                | Excitation and emission                                                                                                                                                                                                                                                                                  | Luminescent character                                                                                                                                                               |
|-----|---------------------------------------------------------|----------------------------------------------------------------------------------------------------------------------------------------------------------------------------------------------------------------------------------------------------------------------------------------|----------------------------------------------------------------------------------------------------------------------------------------------------------------------------------------------------------------------------------------------------------------------------------------------------------|-------------------------------------------------------------------------------------------------------------------------------------------------------------------------------------|
| 1   | <i>Chem. Mater.</i> 2008, <b>20</b> , 7010–7016         | [Cu <sub>4</sub> I <sub>4</sub> (PPh <sub>2</sub> (CH <sub>2</sub> ) <sub>2</sub> Si(OCH <sub>2</sub> CH <sub>3</sub> ) <sub>3</sub> ) <sub>4</sub> ] (C1)<br>[Cu <sub>4</sub> I <sub>4</sub> -(PPh <sub>2</sub> (CH <sub>2</sub> ) <sub>2</sub> CH <sub>3</sub> ) <sub>4</sub> ] (C2) | 295 K $\lambda_{\text{ex}} = 300 \text{ nm}$<br>$\lambda_{\text{em}} = 585 \text{ nm}$ (C1)<br>$\lambda_{\text{em}} = 553 \text{ nm}$ (C2)<br>87 K $\lambda_{\text{ex}} = 300 \text{ nm}$<br>$\lambda_{\text{em}} = 312 \text{ nm}$ (C1)<br>$\lambda_{\text{em}} = 425 \text{ and } 572 \text{ nm}$ (C2) | a) Bright yellow luminescence at room temperature and blue (C1) and purple (C2) luminescence at 77 K.<br>b) Dual emission.<br>c) Large blue-shifts of 273 and 128 nm for C1 and C2. |
| 2   | <i>Angew. Chem. Int. Ed.</i> 2008, <b>47</b> , 685–688  | [Cu <sub>4</sub> I <sub>4</sub> L <sub>2</sub> ] <sub>n</sub> [L = 2-(cyclohexylthio)-1-thiomorpholinoethanone]                                                                                                                                                                        | 298 K $\lambda_{\text{ex}} = 350 \text{ nm}$<br>$\lambda_{\text{em}} = 538 \text{ nm}$<br>77 K $\lambda_{\text{ex}} = 350 \text{ nm}$<br>$\lambda_{\text{em}} = 599 \text{ nm}$                                                                                                                          | a) Orange luminescence at room temperature and red luminescence at 77 K.<br>b) Large red-shifts of 61 nm.                                                                           |
| 3   | <i>J. Am. Chem. Soc.</i> 2010, <b>132</b> , 10967–10969 | [Cu <sub>4</sub> I <sub>4</sub> (PPh <sub>2</sub> (CH <sub>2</sub> CH=CH <sub>2</sub> )) <sub>4</sub> ]                                                                                                                                                                                | 275 K $\lambda_{\text{ex}} = 360 \text{ nm}$<br>$\lambda_{\text{em}} = 530 \text{ nm}$<br>8 K $\lambda_{\text{ex}} = 360 \text{ nm}$<br>$\lambda_{\text{em}} = 440 \text{ nm}$                                                                                                                           | a) Pale green luminescence at 295 K and blue luminescence at 77 K.<br>b) Large blue-shift of 90 nm.                                                                                 |
| 4   | <i>Chem. Eur. J.</i> , 2010, <b>16</b> , 1553-1559      | [Cu <sub>4</sub> I <sub>4</sub> -(DABCO) <sub>2</sub> ](DABCO=1,4-diazabicyclo[2.2.2]octane) with two different crystalline forms, I and II.                                                                                                                                           | 295 K $\lambda_{\text{ex}} = 349 \text{ nm}$<br>$\lambda_{\text{em}} = 580 \text{ nm}$ (I)<br>$\lambda_{\text{em}} = 556 \text{ nm}$ (II)<br>77 K $\lambda_{\text{ex}} = 339 \text{ nm}$<br>$\lambda_{\text{em}} = 590 \text{ nm}$ (I)<br>$\lambda_{\text{em}} = 578 \text{ nm}$ (II)                    | a) Emission colour from yellow at 295 K to deep orange at 77 K.<br>b) Red-shifts of 10 and 22 nm for I and II.                                                                      |

|   |                                                      |                                                                                                                                         |                                 |                                                                                                                                                                                                                                                                                                                                                          |                                                                                                                         |
|---|------------------------------------------------------|-----------------------------------------------------------------------------------------------------------------------------------------|---------------------------------|----------------------------------------------------------------------------------------------------------------------------------------------------------------------------------------------------------------------------------------------------------------------------------------------------------------------------------------------------------|-------------------------------------------------------------------------------------------------------------------------|
| 5 | <i>Chem. Commun.</i> , 2011, <b>47</b> , 12441–12443 | $[\text{Cu}_4\text{I}_4(\text{NH}_3)\text{Cu}_3\text{L}_3]_n$<br>[L=3-(4-pyridyl)-5-( <i>p</i> -tolyl) pyrazolate]                      | 293 K<br>77 K                   | $\lambda_{\text{ex}} = 365 \text{ nm}$<br>$\lambda_{\text{em}} = 530 \text{ and } 700 \text{ nm}$<br>$\lambda_{\text{ex}} = 365 \text{ nm}$<br>$\lambda_{\text{em}} = 530 \text{ nm}$                                                                                                                                                                    | a) The luminescence changes correspondingly from yellow to brighter green from 293 K to 77 K.<br>b) Dual emission       |
| 6 | <i>Chem. Commun.</i> , 2013, <b>49</b> , 6152-6154   | $[\text{Cu}_4\text{I}_4(\text{dmimpr})_2]_n$ [dmimpr = 1,3-di(2-methylimidazol-1-yl)-propane]                                           | 298 K<br>220 K<br>183 K<br>77 K | $\lambda_{\text{ex}} = 360 \text{ nm}$<br>$\lambda_{\text{em}} = 555 \text{ nm}$<br>$\lambda_{\text{ex}} = 360 \text{ nm}$<br>$\lambda_{\text{em}} = 565 \text{ nm}$<br>$\lambda_{\text{ex}} = 360 \text{ nm}$<br>$\lambda_{\text{em}} = 572 \text{ nm}$<br>$\lambda_{\text{ex}} = 360 \text{ nm}$<br>$\lambda_{\text{em}} = 596 \text{ nm}$             | a) Bright yellow luminescence at room temperature and orange-red luminescence at 77 K.<br>b) Large red-shifts of 41 nm. |
| 7 | <i>Chem. Sci.</i> , 2013, <b>4</b> , 1484-1489       | $[(\text{Cu}^{\text{I}}_4\text{I}_4)_3(\text{Cu}^{\text{I}}_6)_2(3\text{-ptt})_{12}]_n \cdot 24\text{nDEF} \cdot 12\text{nH}_2\text{O}$ | RT<br>77 K<br>10 K              | $\lambda_{\text{ex}} = 275 \text{ and } 370 \text{ nm}$<br>$\lambda_{\text{em}} = 780 \text{ and } 795 \text{ nm}$<br>$\lambda_{\text{ex}} = 323 \text{ and } 365 \text{ nm}$<br>$\lambda_{\text{em}} = 590, 834/590, 834 \text{ nm}$<br>$\lambda_{\text{ex}} = 323 \text{ and } 365 \text{ nm}$<br>$\lambda_{\text{em}} = 594, 841/592, 853 \text{ nm}$ | a) Emission with both thermochromic and NIR luminescence<br>b) Dual emission<br>c) Large red-shift of about 50 nm.      |
| 8 | <i>Chem. Eur. J.</i> 2013, <b>19</b> , 15831 – 15835 | $[\text{Cu}_4\text{I}_4(\text{PPh}_2(\text{C}_6\text{H}_4)\text{CH}_2\text{OH})_4]$                                                     | 290 K<br>8 K                    | $\lambda_{\text{ex}} = 300 \text{ nm}$<br>$\lambda_{\text{em}} = 535 \text{ nm}$<br>$\lambda_{\text{ex}} = 300 \text{ nm}$<br>$\lambda_{\text{em}} = 425 \text{ nm}$                                                                                                                                                                                     | a) Green emission at the room-temperature becomes blue emission in liquid nitrogen.<br>b) Large blue-shift of 110 nm.   |

|    |                                                       |                                                                                                                                                                                                                               |                                                                                                                                                                                                                                                                                                                  |                                                                                                                                                                          |
|----|-------------------------------------------------------|-------------------------------------------------------------------------------------------------------------------------------------------------------------------------------------------------------------------------------|------------------------------------------------------------------------------------------------------------------------------------------------------------------------------------------------------------------------------------------------------------------------------------------------------------------|--------------------------------------------------------------------------------------------------------------------------------------------------------------------------|
| 9  | <i>Cryst. Growth Des.</i> 2014, <b>14</b> , 5373–5387 | $[\{\text{Cu}_4(\mu_3\text{-I})_4\}(\mu\text{-L}_8)_2]_n$ [L8=bis(5-tert-butyl-2-methylphenylthio)-Methane]                                                                                                                   | 298 K $\lambda_{\text{ex}} = 341$ nm<br>$\lambda_{\text{em}} = 587$ nm<br>77 K $\lambda_{\text{ex}} = 334$ nm<br>$\lambda_{\text{em}} = 417$ and 638 nm                                                                                                                                                          | a) Bright yellow luminescence at room temperature and red luminescence at 77 K.<br>b) Large shift of 51 nm.<br>c) Dual emission.                                         |
| 10 | <i>CrystEngComm</i> , 2014, <b>16</b> , 1927–1933     | $[\text{Cu}_4\text{I}_4(\text{bpmp})_2]_n$ (1)<br>[bpmp=1,4-bis(pyridin-4-ylmethyl)piperazine]                                                                                                                                | 298 K $\lambda_{\text{ex}} = 365$ nm<br>$\lambda_{\text{em}} = 585$ nm<br>77 K $\lambda_{\text{ex}} = 365$ nm<br>$\lambda_{\text{em}} = 615$ nm                                                                                                                                                                  | a) Bright yellow luminescence at room temperature and orange-red luminescence at 77 K.<br>b) A red shift of 30 nm                                                        |
| 11 | <i>Chem. Eur. J.</i> 2015, <b>21</b> , 1439 – 1443    | $[\text{Cu}_4\text{I}_4\text{L}_2(\text{MeCN})_2]_n$ (1)<br>$[\text{Cu}_4\text{I}_4\text{L}_2]_n$ (2)<br>$\{[\text{Cu}_4\text{I}_4\text{L}_2] \cdot \text{MeOH}\}_n$ (3)<br>[L=2-(tert-butylthio)-N-(pyridin-3-yl)-Acetamide] | 298 K $\lambda_{\text{ex}} = 350$ nm<br>$\lambda_{\text{em}} = 460$ nm (1)<br>$\lambda_{\text{em}} = 590$ nm (2)<br>$\lambda_{\text{em}} = 530$ nm (3)<br>303 K $\lambda_{\text{ex}} = 350$ nm<br>$\lambda_{\text{em}} = 590$ nm (1)<br>$\lambda_{\text{em}} = 590$ nm (2)<br>$\lambda_{\text{em}} = 595$ nm (3) | a) Blue, orange and yellow emission at room temperature for 1, 2 and 3, respectively, and orange emission at 303 K.<br>b) Large red-shfits of 130 and 65 nm for 1 and 3. |

**Table S2** Selected bond lengths (Å) and bond angles (°) for coordination polymers **1** and **2**.

---

| <b>1</b>      |          |                    |          |
|---------------|----------|--------------------|----------|
| I(1)-Cu(1)    | 2.515(1) | N(3)-Cu(2)-I(2)    | 107.8(1) |
| I(1)-Cu(2)    | 2.690(8) | N(3)-Cu(2)-I(1)    | 100.2(1) |
| I(2)-Cu(1)    | 2.706(2) | I(2)-Cu(2)-I(1)    | 108.2(0) |
| I(2)-Cu(2)    | 2.667(2) | N(3)-Cu(2)-I(3)    | 129.6(1) |
| I(2)-Cu(3)    | 2.782(1) | I(2)-Cu(2)-I(3)    | 108.7(3) |
| I(3)-Cu(2)    | 2.723(4) | I(1)-Cu(2)-I(3)    | 100.2(0) |
| I(3)-Cu(3)    | 2.638(1) | N(5)-Cu(3)-I(3)#2  | 107.6(1) |
| I(3)-Cu(3)#2  | 2.637(0) | N(5)-Cu(3)-I(3)    | 113.3(1) |
| Cu(2)-N(3)    | 2.001(4) | I(3)#2-Cu(3)-I(3)  | 116.2(3) |
| Cu(3)-N(5)    | 2.004(4) | N(5)-Cu(3)-I(2)    | 97.4(1)  |
| Cu(3)-I(3)#2  | 2.637(2) | I(3)#2-Cu(3)-I(2)  | 113.2(3) |
| Cu(3)-Cu(3)#2 | 2.788(2) | I(3)-Cu(3)-I(2)    | 107.8(3) |
| Cu(1)-N(1)    | 1.959(4) | N(5)-Cu(3)-Cu(3)#2 | 131.3(1) |
|               |          | N(1)-Cu(1)-I(1)    | 138.3(1) |
|               |          | N(1)-Cu(1)-I(2)    | 107.7(1) |
|               |          | I(1)-Cu(1)-I(2)    | 112.9(3) |
| <b>2</b>      |          |                    |          |
| Cu(1)-N(1)    | 2.003(4) | N(1)-Cu(1)-I(3)    | 106.5(1) |
| Cu(1)-I(3)    | 2.644(1) | N(1)-Cu(1)-I(1)    | 106.3(1) |
| Cu(1)-Cu(4)   | 2.654(3) | N(1)-Cu(1)-I(2)    | 100.7(1) |
| Cu(1)-I(1)    | 2.684(2) | I(3)-Cu(1)-I(2)    | 113.0(3) |
| Cu(1)-Cu(3)   | 2.690(1) | I(1)-Cu(1)-I(2)    | 111.4(3) |
| Cu(1)-Cu(2)   | 2.702(1) | N(4)#1-Cu(2)-I(2)  | 108.2(1) |
| Cu(1)-I(2)    | 2.739(1) | N(4)#1-Cu(2)-I(4)  | 106.9(1) |
| Cu(2)-N(4)#1  | 2.006(4) | I(2)-Cu(2)-I(4)    | 116.5(3) |
| Cu(2)-Cu(4)   | 2.650(1) | N(4)#1-Cu(2)-I(3)  | 101.4(1) |
| Cu(2)-Cu(3)   | 2.656(1) | I(2)-Cu(2)-I(3)    | 110.7(3) |
| Cu(2)-I(2)    | 2.672(1) | I(4)-Cu(2)-I(3)    | 111.9(3) |
| Cu(2)-I(4)    | 2.702(0) | N(5)-Cu(3)-I(1)    | 110.5(1) |
| Cu(2)-I(3)    | 2.785(2) | N(5)-Cu(3)-I(2)    | 102.4(1) |
| Cu(3)-N(5)    | 2.005(4) | I(1)-Cu(3)-I(2)    | 112.4(3) |
| Cu(3)-I(1)    | 2.671(0) | N(5)-Cu(3)-I(4)    | 103.3(1) |
| Cu(3)-Cu(4)   | 2.719(1) | I(1)-Cu(3)-I(4)    | 113.9(3) |
| Cu(3)-I(2)    | 2.721(1) | I(2)-Cu(3)-I(4)    | 113.4(3) |
| Cu(3)-I(4)    | 2.747(1) | N(8)#2-Cu(4)-I(4)  | 108.7(1) |
| Cu(4)-N(8)#2  | 2.007(4) | I(3)-Cu(4)-I(4)    | 117.0(3) |
| Cu(4)-I(3)    | 2.665(1) | N(8)#2-Cu(4)-I(1)  | 99.1(1)  |
| Cu(4)-I(4)    | 2.666(1) | I(3)-Cu(4)-I(1)    | 111.3(3) |
| Cu(4)-I(1)    | 2.843(0) | I(4)-Cu(4)-I(1)    | 111.0(3) |

---

Symmetry transformations used to generate equivalent atoms: #1: -x, -y+2, -z; #2: -x, -y+1, -z+1.
